# Supplementary material
Source: PubMed Central journal article supplement (PMC4875083)

## Supplements:

**Supplemental Figure 1. Ubc9 knockdown in HeLa cells by RNAi.** (A) The putative sumoylation sites (*italics*) in RIG-I were predicted by SUMOplot Analysis Program. (B–C)  $2 \times 10^6$  HeLa cells were pre-infected with 2MOI lentivirus vector, lentivirus containing Ubc9-shRNA or Ubc9-shRNA scrambled. (B) Forty-eight hours post-infection, cells were collected and performed to detect Ubc9 mRNA level after different treatment by RT-PCR. *hGAPDH* as loading control. (C) Twelve hours post-lentiviral infection, cells were transfected with pCMV-HA-SUMO-1. Thirty-six hours post-transfection, cells were lysed in  $1 \times$ SDS loading buffer and boiled for 5 minutes, then the cell lysate was subjected to separation by SDS-PAGE and Immunoblotted with anti-HA antibody.

A .....95DFKKIEKLEEYR..... .....203EDKMETSIDIQ.....  
.....253AMKGKNT IICA..... .....462FRKVESRISDK.....  
.....508TQKYEQWIVT..... .....528PDKDEESRICK.....  
.....839AFKECFVSRP..... .....888VIKIESFVVEDI.....

B

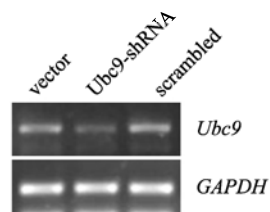

C

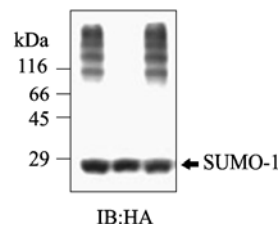

**Supplemental Figure 2. K172R mutation has no effect on RIG-I SUMOylation and SUMO-1 attachment site in RIG-I might be non-consensus.** HEK293T cells were co-transfected with pCMV-HA-SUMO-1, pcDEF-Myc-Ubc9, pEF-Flag-RIG-I or its K/R mutation mediated by calcium phosphate method. Forty-eight hours post-transfection, cells were lysed in IP buffer. The cell lysates were immunoprecipitated with anti-Flag antibody and immunoblotted with anti-Flag or anti-HA antibody.

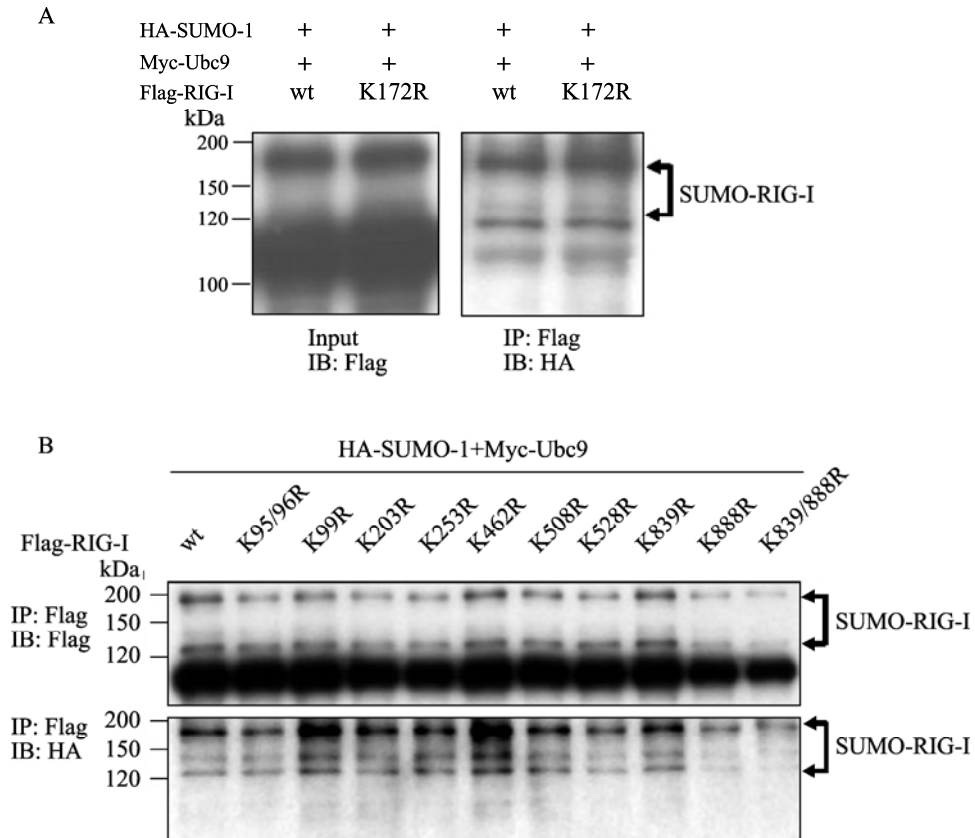

Supplement: 13238_2010_30_MOESM1_ESM.pdf [file 13238_2010_30_MOESM1_ESM.pdf]
